# Supplementary material for: Seasonal patterns in Arctic planktonic metabolism (Fram Strait – Svalbard region)
Source: Copernicus journal article supplement (doi:10.5194/bg-10-1451-2013), 2013-03-04
Supplement: Supplementary file 1 [file bg-10-1451-2013-supplement.pdf]

Supplementary Material for

**Seasonal patterns in Arctic planktonic metabolism**

**(Fram Strait - Svalbard region)**

Raquel Vaquer-Sunyer\*, Carlos M. Duarte, Johnna Holding, Aurore Regaudie-de-Gioux,

Lara S. García-Corral, Marit Reigstad and Paul Wassmann

\*Corresponding author: : [Raquel.Vaquer-Sunyer@geol.lu.se](mailto:Raquel.Vaquer-Sunyer@geol.lu.se)

**This PDF includes:**

Supplementary Table S1

Supplementary Table S2

Supplementary Table S3

Table S1. Planktonic metabolic rates ( $\text{mmol O}_2 \text{ m}^{-3} \text{ d}^{-1}$ ) for all stations and cruises conducted in the present study. Rates are given as gross primary production (GPP), net community production (NCP) and community respiration (CR) and their associated standard error (SE). Values for the ratio between GPP and CR and between NCP and GPP are also reported.

| Cruise | Station | date     | depth (m) | Mixed layer depth (m) | NCP (mmol/m <sup>3</sup> /d) | SE   | CR (mmol/m <sup>3</sup> /d) | SE   | GPP (mmol/m <sup>3</sup> /d) | SE   | GPP/CR | SE   | NCP/GPP | SE      |
|--------|---------|----------|-----------|-----------------------|------------------------------|------|-----------------------------|------|------------------------------|------|--------|------|---------|---------|
| ATOS   | 1b      | 01/07/07 | 1         | 7.0                   | 0.16                         | 0.62 | 0.43                        | 0.59 | 0.59                         | 0.26 | 1.37   | 1.96 | 0.27    | 1.05    |
| ATOS   | 1b      | 01/07/07 | 15        | 7.0                   | 0.68                         | 0.59 | 0.54                        | 0.38 | 1.23                         | 0.54 | 2.27   | 1.87 | 0.56    | 0.54    |
| ATOS   | 1b      | 01/07/07 | 30        | 7.0                   | -3.70                        | 1.64 | 3.74                        | 1.07 | 0.05                         | 1.48 | 0.01   | 0.40 | -78.95  | 2493.60 |
| ATOS   | 2b      | 02/07/07 | 1         |                       | 1.40                         | 0.31 | 0.24                        | 0.25 | 1.64                         | 0.33 | 6.87   | 7.23 | 0.85    | 0.25    |
| ATOS   | 2b      | 02/07/07 | 10        |                       | -4.20                        | 0.88 |                             |      |                              |      |        |      |         |         |
| ATOS   | 2b      | 02/07/07 | 30        |                       | -1.28                        | 0.32 | 2.95                        | 0.64 | 1.67                         | 0.68 | 0.57   | 0.26 | -0.77   | 0.37    |
| ATOS   | 3b      | 03/07/07 | 1         | 23.0                  | 0.69                         | 0.36 | 1.61                        | 0.33 | 2.30                         | 0.32 | 1.43   | 0.35 | 0.30    | 0.16    |
| ATOS   | 3b      | 03/07/07 | 10        | 23.0                  | 0.09                         | 0.28 | 1.98                        | 0.59 | 2.08                         | 0.58 | 1.05   | 0.42 | 0.05    | 0.14    |
| ATOS   | 3b      | 03/07/07 | 26        | 23.0                  | -1.16                        | 0.75 | 2.71                        | 0.65 | 1.55                         | 0.81 | 0.57   | 0.33 | -0.75   | 0.62    |
| ATOS   | 4b      | 04/07/07 | 1         | 9.0                   | 0.39                         | 0.26 | 1.94                        | 0.32 | 2.34                         | 0.29 | 1.20   | 0.25 | 0.17    | 0.11    |
| ATOS   | 4b      | 04/07/07 | 10        | 9.0                   | 1.16                         | 0.27 | 1.00                        | 0.57 | 2.15                         | 0.59 | 2.17   | 1.38 | 0.54    | 0.19    |
| ATOS   | 4b      | 04/07/07 | 32        | 9.0                   | -0.77                        | 0.81 | 3.11                        | 0.36 | 2.34                         | 0.84 | 0.75   | 0.28 | -0.33   | 0.37    |
| ATOS   | 5b      | 05/07/07 | 1         | 6.0                   | 6.04                         | 0.32 | 2.11                        | 0.22 | 8.15                         | 0.32 | 3.87   | 0.44 | 0.74    | 0.05    |
| ATOS   | 5b      | 05/07/07 | 5         | 6.0                   | 10.55                        | 0.60 | 3.35                        | 0.28 | 13.89                        | 0.59 | 4.15   | 0.39 | 0.76    | 0.05    |
| ATOS   | 5b      | 05/07/07 | 15        | 6.0                   | 7.23                         | 2.55 | 2.78                        | 0.46 | 10.01                        | 2.54 | 3.60   | 1.09 | 0.72    | 0.31    |
| ATOS   | 6a      | 06/07/07 | 1         | 13.0                  | 4.87                         | 0.57 | 3.03                        | 0.52 | 7.89                         | 0.64 | 2.61   | 0.50 | 0.62    | 0.09    |
| ATOS   | 6a      | 06/07/07 | 20        | 13.0                  | -4.86                        | 0.33 | 11.68                       | 0.28 | 6.82                         | 0.35 | 0.58   | 0.03 | -0.71   | 0.06    |
| ATOS   | 6a      | 06/07/07 | 36        | 13.0                  | 2.15                         | 0.74 | 1.57                        | 0.31 | 3.72                         | 0.68 | 2.37   | 0.64 | 0.58    | 0.22    |
| ATOS   | 9a      | 07/07/07 | 1         | 5.0                   | 12.68                        | 0.59 | 1.60                        | 1.16 | 14.28                        | 1.27 | 8.93   | 6.50 | 0.89    | 0.09    |
| ATOS   | 9a      | 07/07/07 | 5         | 5.0                   | 1.93                         | 1.48 | 4.58                        | 1.21 | 6.51                         | 0.90 | 1.42   | 0.43 | 0.30    | 0.23    |
| ATOS   | 9a      | 07/07/07 | 15        | 5.0                   | 0.61                         | 1.14 | 2.56                        | 0.24 | 3.17                         | 1.13 | 1.24   | 0.46 | 0.19    | 0.37    |
| ATOS   | 12a     | 08/07/07 | 1         | 8.0                   | 7.06                         | 0.34 | 3.42                        | 0.33 | 10.48                        | 0.25 | 3.06   | 0.30 | 0.67    | 0.04    |
| ATOS   | 12a     | 08/07/07 | 5         | 8.0                   | 8.99                         | 1.02 | 3.59                        | 0.43 | 12.58                        | 1.09 | 3.50   | 0.51 | 0.71    | 0.10    |
| ATOS   | 12a     | 08/07/07 | 10        | 8.0                   | 3.06                         | 2.02 | 4.75                        | 0.60 | 7.81                         | 2.06 | 1.65   | 0.48 | 0.39    | 0.28    |
| ATOS   | 15a     | 09/07/07 | 1         | 16.0                  | 22.71                        | 0.66 | 2.53                        | 0.23 | 25.24                        | 0.66 | 9.99   | 0.93 | 0.90    | 0.04    |
| ATOS   | 15a     | 09/07/07 | 5         | 16.0                  | 20.37                        | 0.25 | 4.07                        | 0.31 | 24.44                        | 0.29 | 6.01   | 0.47 | 0.83    | 0.01    |
| ATOS   | 15a     | 09/07/07 | 20        | 16.0                  | 10.88                        | 2.65 | 2.43                        | 0.32 | 13.31                        | 2.66 | 5.47   | 1.31 | 0.82    | 0.26    |
| ATOS   | 18a     | 10/07/07 | 1         | 15.0                  | 1.97                         | 0.52 | 1.86                        | 0.53 | 3.82                         | 0.29 | 2.06   | 0.61 | 0.51    | 0.14    |
| ATOS   | 18a     | 10/07/07 | 5         | 15.0                  | 3.16                         | 0.29 | 1.74                        | 0.38 | 4.90                         | 0.33 | 2.82   | 0.64 | 0.64    | 0.07    |
| ATOS   | 18a     | 10/07/07 | 27        | 15.0                  | 1.08                         | 0.44 | 2.73                        | 1.16 | 3.81                         | 1.13 | 1.39   | 0.73 | 0.28    | 0.14    |

| Cruise | Station | date     | depth (m) | Mixed layer<br>depth (m) | NCP<br>(mmol/m3/d) | SE   | CR<br>(mmol/m3/d) | SE   | GPP<br>(mmol/m3/d) | SE   | GPP/CR | SE   | NCP/GPP | SE     |
|--------|---------|----------|-----------|--------------------------|--------------------|------|-------------------|------|--------------------|------|--------|------|---------|--------|
| ATOS   | 19a     | 11/07/07 | 2         | 12.0                     | 2.82               | 3.72 | 3.18              | 0.69 | 6.00               | 3.77 | 1.89   | 1.25 | 0.47    | 0.69   |
| ATOS   | 19a     | 11/07/07 | 12        | 12.0                     | 5.94               | 0.26 | 2.80              | 0.33 | 8.74               | 0.35 | 3.12   | 0.39 | 0.68    | 0.04   |
| ATOS   | 19a     | 11/07/07 | 25        | 12.0                     | 0.89               | 0.54 | 1.01              | 0.31 | 1.90               | 0.47 | 1.88   | 0.75 | 0.47    | 0.31   |
| ATOS   | 20a     | 12/07/07 | 1         | 17.0                     | -0.18              | 0.25 | 3.39              | 0.25 | 3.21               | 0.31 | 0.95   | 0.11 | -0.06   | 0.08   |
| ATOS   | 20a     | 12/07/07 | 10        | 17.0                     | 1.00               | 0.70 | 14.26             | 0.78 | 15.26              | 0.85 | 1.07   | 0.08 | 0.07    | 0.05   |
| ATOS   | 20a     | 12/07/07 | 25        | 17.0                     | -5.64              | 0.66 | 11.65             | 1.68 | 6.02               | 1.80 | 0.52   | 0.17 | -0.94   | 0.30   |
| ATOS   | 23a     | 13/07/07 | 1         | 10.0                     | -10.23             | 2.50 | 13.00             | 2.71 | 2.78               | 0.24 | 0.21   | 0.05 | -3.68   | 0.95   |
| ATOS   | 23a     | 13/07/07 | 10        | 10.0                     | -7.54              | 1.79 | 12.92             | 1.94 | 5.38               | 1.05 | 0.42   | 0.10 | -1.40   | 0.43   |
| ATOS   | 23a     | 13/07/07 | 24        | 10.0                     | 3.39               | 0.52 | 3.51              | 1.53 | 6.90               | 1.60 | 1.97   | 0.97 | 0.49    | 0.14   |
| ATOS   | 26a     | 14/07/07 | 1         | 10.0                     | -0.82              | 0.32 | 2.14              | 0.18 | 1.32               | 0.33 | 0.62   | 0.16 | -0.62   | 0.29   |
| ATOS   | 26a     | 14/07/07 | 15        | 10.0                     | -12.94             | 4.14 | 18.52             | 4.15 | 5.58               | 0.60 | 0.30   | 0.07 | -2.32   | 0.78   |
| ATOS   | 26a     | 14/07/07 | 27        | 10.0                     | 4.61               | 1.50 | 3.48              | 0.36 | 8.09               | 1.51 | 2.32   | 0.50 | 0.57    | 0.21   |
| ATOS   | 27a     | 15/07/07 | 1         |                          | -4.77              | 8.05 | 20.88             | 1.06 | 16.11              | 7.98 | 0.77   | 0.38 | -0.30   | 0.52   |
| ATOS   | 27a     | 15/07/07 | 15        |                          | -21.72             | 1.88 | 29.20             | 1.81 | 7.49               | 0.64 | 0.26   | 0.03 | -2.90   | 0.35   |
| ATOS   | 27a     | 15/07/07 | 30        |                          | 6.04               | 0.72 | 1.16              | 0.72 | 7.21               | 0.48 | 6.19   | 3.85 | 0.84    | 0.11   |
| ATOS   | 33a     | 17/07/07 | 1         | 5.0                      | -0.75              | 0.43 | 2.41              | 0.31 | 1.66               | 0.47 | 0.69   | 0.22 | -0.45   | 0.29   |
| ATOS   | 33a     | 17/07/07 | 10        | 5.0                      | 4.26               | 0.41 | 3.42              | 0.39 | 7.68               | 0.39 | 2.24   | 0.28 | 0.55    | 0.06   |
| ATOS   | 33a     | 17/07/07 | 22        | 5.0                      | -0.27              | 0.63 | 1.21              | 0.56 | 0.93               | 0.49 | 0.77   | 0.54 | -0.29   | 0.70   |
| ATOS   | 36b     | 18/07/07 | 1         | 14.0                     | 12.67              | 0.36 |                   |      |                    |      |        |      |         |        |
| ATOS   | 36b     | 18/07/07 | 14        | 14.0                     | 14.33              | 0.49 |                   |      |                    |      |        |      |         |        |
| ATOS   | 36b     | 18/07/07 | 30        | 14.0                     | 12.37              | 0.44 |                   |      |                    |      |        |      |         |        |
| ATOS   | 39a     | 19/07/07 | 1         | 8.0                      | -1.16              | 1.06 | 1.20              | 0.68 | 0.05               | 0.94 | 0.04   | 0.78 | -25.38  | 520.88 |
| ATOS   | 39a     | 19/07/07 | 5         | 8.0                      | 0.46               | 0.46 | 1.31              | 0.57 | 1.78               | 0.56 | 1.35   | 0.73 | 0.26    | 0.27   |
| ATOS   | 39a     | 19/07/07 | 32        | 8.0                      | 1.68               | 0.56 | 2.65              | 2.25 | 4.33               | 2.26 | 1.63   | 1.62 | 0.39    | 0.24   |
| ATOS   | 42a     | 20/07/07 | 1         |                          | 0.43               | 0.56 | 1.05              | 0.52 | 1.48               | 0.55 | 1.41   | 0.87 | 0.29    | 0.39   |
| ATOS   | 42a     | 20/07/07 | 10        |                          | 8.94               | 0.83 | 3.16              | 1.60 | 12.11              | 1.77 | 3.83   | 2.01 | 0.74    | 0.13   |
| ATOS   | 42a     | 20/07/07 | 20        |                          | 3.60               | 1.57 | 1.79              | 0.59 | 5.39               | 1.60 | 3.02   | 1.34 | 0.67    | 0.35   |
| ATOS   | 43a     | 22/07/07 | 1         | 13                       | -7.23              | 0.58 | 12.72             | 0.66 | 5.50               | 0.60 | 0.43   | 0.05 | -1.31   | 0.18   |
| ATOS   | 43a     | 22/07/07 | 10        | 13.0                     | -3.84              | 1.39 | 9.40              | 1.23 | 5.56               | 1.51 | 0.59   | 0.18 | -0.69   | 0.31   |
| ATOS   | 43a     | 22/07/07 | 20        | 13.0                     | -1.62              | 1.23 | 12.81             | 1.55 | 11.19              | 1.96 | 0.87   | 0.19 | -0.14   | 0.11   |
| ATOS   | 46a     | 23/07/07 | 1         | 16.0                     | -9.56              | 0.51 | 10.10             | 0.53 | 0.54               | 0.21 | 0.05   | 0.02 | -17.79  | 6.89   |
| ATOS   | 46a     | 23/07/07 | 14        | 16.0                     | -3.45              | 0.47 | 10.22             | 0.37 | 6.76               | 0.39 | 0.66   | 0.05 | -0.51   | 0.08   |
| ATOS   | 46a     | 23/07/07 | 32        | 16.0                     | -8.05              | 0.42 | 8.85              | 0.38 | 0.80               | 0.31 | 0.09   | 0.04 | -10.08  | 4.01   |
| ATOS   | 49a     | 24/07/07 | 1         |                          | -5.61              | 0.58 | 8.36              | 0.86 | 2.76               | 0.78 | 0.33   | 0.10 | -2.03   | 0.61   |

| Cruise     | Station  | date     | depth (m) | Mixed layer<br>depth (m) | NCP<br>(mmol/m3/d) | SE    | CR<br>(mmol/m3/d) | SE    | GPP<br>(mmol/m3/d) | SE   | GPP/CR | SE      | NCP/GPP | SE    |
|------------|----------|----------|-----------|--------------------------|--------------------|-------|-------------------|-------|--------------------|------|--------|---------|---------|-------|
| ATOS       | 49a      | 24/07/07 | 10        |                          | -6.37              | 0.41  | 7.42              | 0.47  | 1.05               | 0.54 | 0.14   | 0.07    | -6.05   | 3.13  |
| ATOS       | 49a      | 24/07/07 | 30        |                          | -4.67              | 0.79  | 7.52              | 1.31  | 2.85               | 1.45 | 0.38   | 0.20    | -1.64   | 0.88  |
| IAOOS 2007 | FS002Bb  | 16/4/07  | 1         | 15.2                     | 3.34               | 0.33  |                   |       |                    |      |        |         |         |       |
| IAOOS 2007 | FS002Bb  | 16/4/07  | 5         | 15.2                     | 2.06               | 0.38  |                   |       |                    |      |        |         |         |       |
| IAOOS 2007 | FS002Bb  | 16/4/07  | 10        | 15.2                     | 10.96              | 2.49  |                   |       |                    |      |        |         |         |       |
| IAOOS 2007 | FS002Bb  | 16/4/07  | 20        | 15.2                     | -0.58              | 0.48  | 1.06              | 0.48  | 0.48               | 0.41 | 0.45   | 0.44    | -1.21   | 1.43  |
| IAOOS 2007 | FS003Bb  | 18/4/07  | 1         |                          | 0.48               | 8.51  |                   |       |                    |      |        |         |         |       |
| IAOOS 2007 | FS003Bb  | 18/4/07  | 10        |                          | -0.02              | 26.71 |                   |       |                    |      |        |         |         |       |
| IAOOS 2007 | FS003Bb  | 18/4/07  | 20        |                          | 0.04               | 19.18 | 1.73              | 19.47 | 1.88               | 0.38 | 1.09   | 12.28   | 0.02    | 10.18 |
| IAOOS 2007 | FS004Cb  | 22/4/07  | 5         | 14                       | 0.01               | 0.33  | 0.33              | 0.32  | 0.33               | 0.42 | 1.02   | 1.62    | 0.02    | 0.99  |
| IAOOS 2007 | FS004Cb  | 22/4/07  | 10        | 14                       | 0.29               | 0.34  | 0.01              | 0.42  | 0.30               | 0.27 | 28.50  | 1136.72 | 0.96    | 1.43  |
| IAOOS 2007 | FS004Cb  | 22/4/07  | 20        | 14                       | 0.09               | 0.42  |                   |       |                    |      |        |         |         |       |
| IAOOS 2007 | FS005Cb  | 25/4/07  | 5         | 16                       | 1.82               | 0.49  |                   |       |                    |      |        |         |         |       |
| IAOOS 2007 | FS005Cb  | 25/4/07  | 10        | 16                       | 1.52               | 0.19  |                   |       |                    |      |        |         |         |       |
| IAOOS 2007 | FS005Cb  | 25/4/07  | 20        | 16                       | 1.88               | 0.22  |                   |       |                    |      |        |         |         |       |
| IAOOS 2008 | FS080013 | 24/04/08 | 1         | 22                       | 1.98               | 0.16  |                   |       |                    |      |        |         |         |       |
| IAOOS 2008 | FS080013 | 24/04/08 | 5         | 22                       | 4.25               | 0.20  |                   |       |                    |      |        |         |         |       |
| IAOOS 2008 | FS080013 | 24/04/08 | 10        | 22                       | 2.34               | 0.53  |                   |       |                    |      |        |         |         |       |
| IAOOS 2008 | FS080013 | 24/04/08 | 20        | 22                       | -1.11              | 0.53  |                   |       |                    |      |        |         |         |       |
| IAOOS 2008 | FS080032 | 29/04/08 | 1         | >20                      | 2.72               | 0.93  |                   |       |                    |      |        |         |         |       |
| IAOOS 2008 | FS080032 | 29/04/08 | 5         | >20                      | 3.70               | 0.51  |                   |       |                    |      |        |         |         |       |
| IAOOS 2008 | FS080032 | 29/04/08 | 10        | >20                      | 3.25               | 0.38  |                   |       |                    |      |        |         |         |       |
| IAOOS 2008 | FS080032 | 29/04/08 | 20        | >20                      | 8.46               | 0.30  |                   |       |                    |      |        |         |         |       |
| IAOOS 2008 | FS080049 | 05/05/08 | 1         | >19                      | -0.44              | 0.49  | 1.72              | 0.47  | 1.28               | 0.32 | 0.75   | 0.28    | -0.34   | 0.39  |
| IAOOS 2008 | FS080049 | 05/05/08 | 5         | >19                      | -0.70              | 0.16  | 0.82              | 0.16  | 0.12               | 0.12 | 0.14   | 0.14    | -6.03   | 6.12  |
| IAOOS 2008 | FS080049 | 05/05/08 | 10        | >19                      | -0.54              | 0.18  |                   |       |                    |      |        |         |         |       |
| IAOOS 2008 | FS080049 | 05/05/08 | 20        | >19                      | 0.92               | 1.42  | 1.00              | 0.23  | 1.93               | 1.42 | 1.92   | 1.48    | 0.48    | 0.82  |
| JM-2008    | 321      | 31/7/08  | 1         | 30.3                     | 0.16               | 0.52  | 1.72              | 0.52  | 1.88               | 0.23 | 1.09   | 0.36    | 0.09    | 0.28  |
| JM-2008    | 321      | 31/7/08  | 10        | 30.3                     | 0.06               | 0.23  | 2.84              | 0.16  | 2.90               | 0.19 | 1.02   | 0.09    | 0.02    | 0.08  |
| JM-2008    | 321      | 31/7/08  | 20        | 30.3                     | 0.57               | 0.69  | 0.61              | 0.70  | 1.17               | 0.35 | 1.94   | 2.31    | 0.48    | 0.60  |
| JM-2008    | 321      | 31/7/08  | 30        | 30.3                     | 0.40               | 0.41  | 2.28              | 0.54  | 2.68               | 0.39 | 1.17   | 0.33    | 0.15    | 0.15  |
| JM-2008    | 324      | 1/8/08   | 1         |                          | 0.54               | 0.32  | 0.80              | 0.31  | 1.35               | 0.20 | 1.67   | 0.69    | 0.40    | 0.24  |
| JM-2008    | 324      | 1/8/08   | 5         |                          | 0.02               | 0.25  | 1.83              | 0.30  | 1.84               | 0.22 | 1.01   | 0.21    | 0.01    | 0.13  |
| JM-2008    | 324      | 1/8/08   | 10        |                          | 0.67               | 0.26  | 2.40              | 0.25  | 3.07               | 0.15 | 1.28   | 0.15    | 0.22    | 0.09  |

| Cruise  | Station | date      | depth (m) | Mixed layer<br>depth (m) | NCP<br>(mmol/m3/d) | SE   | CR<br>(mmol/m3/d) | SE   | GPP<br>(mmol/m3/d) | SE   | GPP/CR | SE    | NCP/GPP | SE   |
|---------|---------|-----------|-----------|--------------------------|--------------------|------|-------------------|------|--------------------|------|--------|-------|---------|------|
| JM-2008 | 324     | 1/8/08    | 20        |                          | 1.30               | 0.36 | 3.22              | 0.87 | 4.52               | 0.83 | 1.40   | 0.46  | 0.29    | 0.10 |
| JM-2008 | 326     | 2/8/08    | 1         |                          | 0.16               | 0.52 | 1.72              | 0.52 | 1.88               | 0.23 | 1.09   | 0.36  | 0.09    | 0.28 |
| JM-2008 | 326     | 2/8/08    | 10        |                          | 0.06               | 0.23 | 2.84              | 0.16 | 2.90               | 0.19 | 1.02   | 0.09  | 0.02    | 0.08 |
| JM-2008 | 326     | 2/8/08    | 20        |                          | 0.40               | 0.41 | 2.28              | 0.54 | 2.68               | 0.39 | 1.17   | 0.33  | 0.15    | 0.15 |
| JM-2008 | 326     | 2/8/08    | 25        |                          | 0.57               | 0.69 | 0.61              | 0.70 | 1.17               | 0.35 | 1.94   | 2.31  | 0.48    | 0.60 |
| JM-2008 | 327     | 3/8/08    | 1         |                          | 0.26               | 0.43 | 0.43              | 0.41 | 0.69               | 0.15 | 1.62   | 1.60  | 0.38    | 0.64 |
| JM-2008 | 327     | 3/8/08    | 5         |                          | -0.04              | 0.19 | 1.01              | 1.01 | 0.97               | 1.00 | 0.96   | 1.38  | -0.04   | 0.20 |
| JM-2008 | 327     | 3/8/08    | 10        |                          | -1.55              | 0.59 | 2.92              | 0.54 | 1.36               | 0.43 | 0.47   | 0.17  | -1.14   | 0.56 |
| JM-2008 | 327     | 3/8/08    | 20        |                          | 1.75               | 0.13 | 0.17              | 0.20 | 1.91               | 0.24 | 11.42  | 13.98 | 0.91    | 0.13 |
| JM-2008 | 329     | 4/8/08    | 1         |                          | -0.62              | 0.32 | 0.59              | 0.38 |                    |      |        |       |         |      |
| JM-2008 | 329     | 4/8/08    | 10        |                          | 1.15               | 0.59 | 2.22              | 0.71 | 3.36               | 0.88 | 1.52   | 0.63  | 0.34    | 0.20 |
| JM-2008 | 329     | 4/8/08    | 20        |                          | 0.71               | 0.38 | 2.72              | 0.34 | 3.43               | 0.19 | 1.26   | 0.17  | 0.21    | 0.11 |
| JM-2008 | 329     | 4/8/08    | 25        |                          | 0.12               | 0.17 | 1.00              | 0.12 | 1.12               | 0.14 | 1.12   | 0.19  | 0.11    | 0.15 |
| JM-2008 | 330     | 5/8/08    | 1         |                          | -0.43              | 0.29 | 0.67              | 0.23 | 0.24               | 0.22 | 0.36   | 0.34  | -1.81   | 2.05 |
| JM-2008 | 330     | 5/8/08    | 5         |                          | 0.13               | 0.31 |                   |      |                    |      |        |       |         |      |
| JM-2008 | 330     | 5/8/08    | 10        |                          | -0.69              | 0.39 | 1.99              | 0.49 | 1.31               | 0.30 | 0.66   | 0.22  | -0.53   | 0.32 |
| JM-2008 | 330     | 5/8/08    | 20        |                          | -1.27              | 0.97 | 1.75              | 1.03 | 0.48               | 0.45 | 0.28   | 0.30  | -2.63   | 3.16 |
| ARCTOS  | 419     | 29/11/06  | 1         | 67.7                     | -0.02              | 1.25 | 0.02              | 0.88 | 0.00               | 0.88 | 0.00   |       |         |      |
| ARCTOS  | 426     | 30/11/06  | 1         |                          | -0.37              | 1.03 | 0.37              | 0.73 | 0.00               | 0.73 | 0.00   |       |         |      |
| ARCTOS  | P1      | 1/12/06   | 1         |                          | -0.19              | 1.16 | 0.19              | 0.82 | 0.00               | 0.82 | 0.00   |       |         |      |
| ARCTOS  | Kb3     | 2/12/06   | 1         |                          | -0.69              | 1.78 | 0.69              | 1.26 | 0.00               | 1.26 | 0.00   |       |         |      |
| ARCTOS  | Kb5     | 2/12/06   | 1         |                          | -1.49              | 0.82 | 1.49              | 0.58 | 0.00               | 0.58 | 0.00   |       |         |      |
| ARCTOS  | Kb1     | 2/12/06   | 1         |                          | -2.56              | 0.70 | 2.56              | 0.50 | 0.00               | 0.50 | 0.00   |       |         |      |
| ARCTOS  | Kb4     | 3/12/06   | 1         |                          | -0.57              | 0.64 | 0.57              | 0.45 | 0.00               | 0.45 | 0.00   |       |         |      |
| ATP 09  | 1       | 17/6/2009 | 2         | >51.5                    | 4.30               | 2.47 | 3.57              | 1.60 | 7.87               | 1.59 | 2.20   | 1.08  | 0.55    | 0.33 |
| ATP 09  | 1       | 17/6/2009 | 25        | >51.5                    | 13.07              | 1.09 | 4.66              | 0.58 | 17.73              | 0.55 | 3.80   | 0.48  | 0.74    | 0.07 |
| ATP 09  | 1       | 17/6/2009 | 50        | >51.5                    | 4.73               | 0.94 | 9.89              | 2.13 | 14.63              | 1.60 | 1.48   | 0.36  | 0.32    | 0.07 |
| ATP 09  | 2       | 18/6/2009 | 1         | 16.8                     | 1.38               | 0.37 |                   |      |                    |      |        |       |         |      |
| ATP 09  | 2       | 18/6/2009 | 17        | 16.8                     | -1.53              | 2.48 | 4.63              | 0.86 | 3.11               | 0.95 | 0.67   | 0.24  | -0.49   | 0.81 |
| ATP 09  | 2       | 18/6/2009 | 35        | 16.8                     | 62.49              | 1.49 | 1.91              | 0.53 | 64.40              | 1.55 | 33.64  | 9.33  | 0.97    | 0.03 |
| ATP 09  | 3       | 19/6/2009 | 1         | 26.7                     | 5.20               | 1.01 | 1.68              | 0.47 | 6.87               | 1.06 | 4.10   | 1.32  | 0.76    | 0.19 |
| ATP 09  | 3       | 19/6/2009 | 10        | 26.7                     | 15.88              | 0.68 | 0.91              | 1.03 | 16.79              | 1.03 | 18.44  | 20.99 | 0.95    | 0.07 |
| ATP 09  | 3       | 19/6/2009 | 25        | 26.7                     | 15.41              | 1.08 | 3.11              | 0.74 | 18.52              | 1.00 | 5.95   | 1.46  | 0.83    | 0.07 |
| ATP 09  | 4       | 20/6/2009 | 1         | 11.9                     | -0.05              | 0.40 | 0.82              | 0.75 | 0.77               | 0.69 | 0.94   | 1.21  | -0.06   | 0.52 |

| Cruise   | Station | date      | depth (m) | Mixed layer<br>depth (m) | NCP<br>(mmol/m3/d) | SE   | CR<br>(mmol/m3/d) | SE   | GPP<br>(mmol/m3/d) | SE   | GPP/CR | SE     | NCP/GPP | SE   |
|----------|---------|-----------|-----------|--------------------------|--------------------|------|-------------------|------|--------------------|------|--------|--------|---------|------|
| ATP 09   | 4       | 20/6/2009 | 15        | 11.9                     | -1.91              | 0.88 | 0.11              | 1.11 |                    |      |        |        |         |      |
| ATP 09   | 4       | 20/6/2009 | 35        | 11.9                     | 2.07               | 0.62 | 1.85              | 0.38 | 3.92               | 0.70 | 2.12   | 0.57   | 0.53    | 0.18 |
| ATP 09   | 5       | 22/6/2009 | 1         |                          | 1.01               | 0.54 | 1.97              | 0.40 | 2.98               | 0.52 | 1.51   | 0.41   | 0.34    | 0.19 |
| ATP 09   | 5       | 22/6/2009 | 15        |                          | 15.08              | 0.69 | 5.06              | 1.11 | 20.14              | 1.11 | 3.98   | 0.90   | 0.75    | 0.05 |
| ATP 09   | 5       | 22/6/2009 | 30        |                          | 12.29              | 1.07 | 2.47              | 0.72 | 14.76              | 1.27 | 5.98   | 1.82   | 0.83    | 0.10 |
| ATP 09   | 6       | 23/6/2009 | 1         |                          | 4.14               | 1.03 | 5.96              | 0.97 | 10.09              | 0.92 | 1.69   | 0.32   | 0.41    | 0.11 |
| ATP 09   | 6       | 23/6/2009 | 10        |                          | 8.08               | 0.63 | 2.29              | 0.72 | 10.37              | 0.72 | 4.52   | 1.45   | 0.78    | 0.08 |
| ATP 09   | 6       | 23/6/2009 | 25        |                          | 16.88              | 1.12 | 0.99              | 0.69 | 17.87              | 0.96 | 18.00  | 12.47  | 0.94    | 0.08 |
| ATP 09   | K4      | 24/6/2009 | 1         | 6.9                      | 1.96               | 0.75 | 4.73              | 2.07 | 6.69               | 1.86 | 1.41   | 0.73   | 0.29    | 0.14 |
| ATP 09   | K4      | 24/6/2009 | 25        | 6.9                      | -0.21              | 0.68 | 0.80              | 0.72 | 0.59               | 0.72 | 0.74   | 1.12   | -0.35   | 1.24 |
| ATP 09   | K4      | 24/6/2009 | 55        | 6.9                      | 0.53               | 0.89 | 5.04              | 0.97 | 5.57               | 1.17 | 1.11   | 0.32   | 0.10    | 0.16 |
| ATP 09   | T16     | 25/6/09   | 1         | 12.9                     | 6.50               | 1.17 |                   |      |                    |      |        |        |         |      |
| ATP 09   | T16     | 25/6/09   | 10        | 12.9                     | 12.35              | 0.57 | 1.87              | 0.68 | 14.22              | 0.68 | 7.60   | 2.76   | 0.87    | 0.06 |
| ATP 09   | T16     | 25/6/09   | 25        | 12.9                     | 7.59               | 1.18 |                   |      |                    |      |        |        |         |      |
| ATP 2010 | 1       | 4/5/10    | 1         | 25.7                     | 16.09              | 1.62 | 23.02             | 7.95 | 39.11              | 8.07 | 1.70   | 0.68   | 0.41    | 0.09 |
| ATP 2010 | 1       | 4/5/10    | 8         | 25.7                     | 18.66              | 1.12 |                   |      |                    |      |        |        |         |      |
| ATP 2010 | 1       | 4/5/10    | 15        | 25.7                     | 16.26              | 0.85 | 3.00              | 1.28 | 19.26              | 1.19 | 6.41   | 2.76   | 0.84    | 0.07 |
| ATP 2010 | 2       | 5/5/10    | 1         | 21.8                     | 16.29              | 0.65 |                   |      |                    |      |        |        |         |      |
| ATP 2010 | 2       | 5/5/10    | 5         | 21.8                     | 14.44              | 0.70 | 0.83              | 0.86 | 15.28              | 0.78 | 18.34  | 18.96  | 0.95    | 0.07 |
| ATP 2010 | 2       | 5/5/10    | 10        | 21.8                     | 15.22              | 0.59 | 0.64              | 0.26 | 15.86              | 0.64 | 24.69  | 9.92   | 0.96    | 0.05 |
| ATP 2010 | 3       | 06/05/10  | 1         | >26                      | 2.85               | 1.01 | 0.76              | 0.99 | 3.62               | 0.34 | 4.73   | 6.12   | 0.79    | 0.29 |
| ATP 2010 | 3       | 06/05/10  | 8         | >26                      | 3.86               | 0.53 | 0.81              | 0.60 | 4.67               | 0.60 | 5.80   | 4.35   | 0.83    | 0.15 |
| ATP 2010 | 3       | 06/05/10  | 12        | >26                      | 2.38               | 0.65 | 1.53              | 0.73 | 3.90               | 0.49 | 2.56   | 1.27   | 0.61    | 0.18 |
| ATP 2010 | 3       | 06/05/10  | 15        | >26                      | 1.37               | 0.38 | 0.16              | 0.18 | 1.52               | 0.41 | 9.80   | 11.49  | 0.90    | 0.35 |
| ATP 2010 | 4       | 07/05/10  | 1         | >15                      | 38.76              | 1.63 | 0.41              | 0.73 | 39.17              | 1.85 | 96.67  | 173.96 | 0.99    | 0.06 |
| ATP 2010 | 4       | 07/05/10  | 8         | >15                      | 37.09              | 1.11 | 0.87              | 1.14 | 37.96              | 1.14 | 43.53  | 56.99  | 0.98    | 0.04 |
| ATP 2010 | 4       | 07/05/10  | 12        | >15                      | 34.63              | 0.88 | 2.21              | 0.98 | 36.84              | 1.31 | 16.69  | 7.44   | 0.94    | 0.04 |
| ATP 2010 | 4       | 07/05/10  | 15        | >15                      | 15.16              | 0.90 | 0.74              | 0.36 | 15.90              | 0.90 | 21.48  | 10.55  | 0.95    | 0.08 |
| ATP 2010 | 5       | 08/05/10  | 1         | >15                      | 17.30              | 0.53 | 5.87              | 3.02 | 23.18              | 2.91 | 3.95   | 2.09   | 0.75    | 0.10 |
| ATP 2010 | 5       | 08/05/10  | 8         | >15                      | 14.86              | 1.02 | 1.82              | 1.09 | 16.68              | 1.09 | 9.17   | 5.52   | 0.89    | 0.08 |
| ATP 2010 | 5       | 08/05/10  | 15        | >15                      | 15.16              | 0.90 | 0.74              | 0.36 | 15.90              | 0.90 | 21.48  | 10.55  | 0.95    | 0.08 |
| ATP 2010 | 6       | 09/05/10  | 1         | 13.9                     | 46.88              | 2.10 | 2.01              | 0.23 | 48.89              | 2.30 | 24.32  | 3.04   | 0.96    | 0.06 |
| ATP 2010 | 6       | 09/05/10  | 8         | 13.9                     | 34.68              | 1.36 | 1.57              | 1.40 | 36.25              | 1.40 | 23.16  | 20.70  | 0.96    | 0.05 |
| ATP 2010 | 6       | 09/05/10  | 12        | 13.9                     | 39.14              | 0.65 | 0.71              | 0.42 | 39.84              | 0.64 | 56.31  | 33.32  | 0.98    | 0.02 |

| Cruise   | Station | date     | depth (m) | Mixed layer<br>depth (m) | NCP<br>(mmol/m3/d) | SE   | CR<br>(mmol/m3/d) | SE   | GPP<br>(mmol/m3/d) | SE   | GPP/CR | SE      | NCP/GPP | SE   |
|----------|---------|----------|-----------|--------------------------|--------------------|------|-------------------|------|--------------------|------|--------|---------|---------|------|
| ATP 2010 | 6       | 09/05/10 | 15        | 13.9                     | 37.92              | 1.44 | 0.07              | 0.96 | 37.99              | 1.16 | 549.75 | 7659.07 | 1.00    | 0.05 |
| ATP 2010 | 7       | 10/05/10 | 1         |                          | 39.81              | 0.35 | 3.15              | 0.79 | 42.96              | 0.91 | 13.64  | 3.45    | 0.93    | 0.02 |
| ATP 2010 | 7       | 10/05/10 | 10        |                          | 45.95              | 1.04 | 0.54              | 1.01 | 46.49              | 1.06 | 85.87  | 160.95  | 0.99    | 0.03 |
| ATP 2010 | 7       | 10/05/10 | 15        |                          | 47.61              | 0.96 |                   |      |                    |      |        |         |         |      |
| ATP 2011 | 215     | 23/5/11  | 3         |                          | 4.35               | 0.50 |                   |      |                    |      |        |         |         |      |
| ATP 2011 | 215     | 23/5/11  | 16        |                          | 11.02              | 0.99 |                   |      |                    |      |        |         |         |      |
| ATP 2011 | 215     | 23/5/11  | 22        |                          |                    | 0.35 |                   |      | 8.56               | 0.39 |        |         |         |      |
| ATP 2011 | 217     | 24/5/11  | 4         | 13.9                     | 32.86              | 0.88 |                   |      |                    |      |        |         |         |      |
| ATP 2011 | 217     | 24/5/11  | 9         | 13.9                     | 26.59              | 0.87 | 2.45              | 0.42 | 29.04              | 0.91 | 11.85  |         | 0.92    | 0.04 |
| ATP 2011 | 217     | 24/5/11  | 16        | 13.9                     | 34.93              | 2.55 | 18.96             | 4.34 | 53.89              | 4.96 | 2.84   | 2.07    | 0.65    | 0.08 |
| ATP 2011 | 219     | 25/5/11  | 1         |                          | 22.63              | 1.61 |                   |      |                    |      |        | 0.70    |         |      |
| ATP 2011 | 219     | 25/5/11  | 9         |                          |                    | 1.56 |                   |      | 18.77              | 0.84 |        |         |         |      |
| ATP 2011 | 219     | 25/5/11  | 15        |                          | 21.46              | 2.08 | 12.51             | 1.77 | 33.97              | 1.26 | 2.72   |         | 0.63    | 0.07 |
| ATP 2011 | 223     | 26/5/11  | 3         |                          | 27.04              | 0.83 | 2.91              | 0.28 | 29.95              | 0.78 | 10.31  | 0.40    | 0.90    | 0.04 |
| ATP 2011 | 223     | 26/5/11  | 10        |                          |                    | 1.31 |                   |      | 39.43              | 0.48 |        | 1.02    |         |      |
| ATP 2011 | 223     | 26/5/11  | 18        |                          | 62.13              | 1.37 | 6.36              | 0.71 | 68.49              | 1.23 | 10.77  |         | 0.91    | 0.03 |
| ATP 2011 | 226     | 27/5/11  | 3         | 41.6                     | 2.87               | 0.92 | 3.61              | 0.91 | 6.48               | 0.37 | 1.79   | 1.21    | 0.44    | 0.14 |
| ATP 2011 | 226     | 27/5/11  | 10        | 41.6                     | 6.67               | 0.45 | 1.17              | 0.62 | 7.84               | 0.62 | 6.70   | 0.46    | 0.85    | 0.09 |
| ATP 2011 | 226     | 27/5/11  | 21        | 41.6                     | -4.47              | 1.64 | 10.60             | 1.40 | 6.13               | 0.68 | 0.58   | 3.58    | -0.73   | 0.28 |
| ATP 2011 | 229     | 28/5/11  | 3         |                          | 13.34              | 0.48 | 3.11              | 0.51 | 16.45              | 0.43 | 5.29   | 0.10    | 0.81    | 0.04 |
| ATP 2011 | 229     | 28/5/11  | 10        |                          | -8.67              | 0.56 | 15.28             | 0.48 | 6.61               | 0.32 | 0.43   | 0.88    | -1.31   | 0.11 |
| ATP 2011 | 229     | 28/5/11  | 16        |                          | 2.77               | 1.10 | 4.28              | 0.93 | 7.06               | 1.00 | 1.65   | 0.03    | 0.39    | 0.17 |
| ATP 2011 | 232     | 29/5/11  | 3         |                          |                    |      |                   |      | 13.79              | 0.65 |        | 0.43    |         |      |
| ATP 2011 | 232     | 29/5/11  | 9         |                          | -13.28             | 0.94 | 40.91             | 0.61 | 27.63              | 0.95 | 0.68   |         | -0.48   | 0.04 |
| ATP 2011 | 232     | 29/5/11  | 20        |                          | 81.64              | 0.66 |                   |      |                    |      |        | 0.03    |         |      |
| ATP 2011 | 234     | 30/5/11  | 3         | 22.8                     | 38.48              | 1.35 | 4.61              | 0.61 | 43.08              | 1.39 | 9.36   |         | 0.89    | 0.04 |
| ATP 2011 | 234     | 30/5/11  | 8         | 22.8                     |                    |      |                   |      | 54.85              | 0.88 |        | 1.27    |         |      |
| ATP 2011 | 234     | 30/5/11  | 15        | 22.8                     | 71.97              | 1.94 | 8.06              | 0.71 | 80.02              | 1.70 | 9.93   |         | 0.90    | 0.03 |
| ATP 2011 | 240     | 31/5/11  | 4         | 10.9                     | 1.97               | 0.45 | 1.30              | 0.47 | 3.27               | 0.18 | 2.51   | 0.90    | 0.60    | 0.14 |
| ATP 2011 | 240     | 31/5/11  | 15        | 10.9                     | 6.90               | 0.43 | 0.41              | 0.30 | 7.31               | 0.41 | 17.80  | 0.91    | 0.94    | 0.08 |
| ATP 2011 | 240     | 31/5/11  | 33        | 10.9                     | 9.44               | 0.81 | 4.93              | 0.86 | 14.37              | 0.56 | 2.92   | 12.91   | 0.66    | 0.06 |
| ATP 2011 | 243     | 1/6/11   | 3         | 30.7                     | 8.39               | 0.29 | 3.33              | 0.20 | 11.72              | 0.23 | 3.52   | 0.52    | 0.72    | 0.03 |
| ATP 2011 | 243     | 1/6/11   | 12        | 30.7                     | 9.09               | 0.49 | 2.88              | 0.31 | 11.97              | 0.55 | 4.15   | 0.23    | 0.76    | 0.05 |
| ATP 2011 | 243     | 1/6/11   | 27        | 30.7                     | 8.75               | 0.44 | 11.88             | 0.64 | 20.63              | 0.45 | 1.74   | 0.48    | 0.42    | 0.02 |

| Cruise   | Station | date   | depth (m) | Mixed layer<br>depth (m) | NCP<br>(mmol/m3/d) | SE   | CR<br>(mmol/m3/d) | SE   | GPP<br>(mmol/m3/d) | SE   | GPP/CR | SE   | NCP/GPP | SE   |
|----------|---------|--------|-----------|--------------------------|--------------------|------|-------------------|------|--------------------|------|--------|------|---------|------|
| ATP 2011 | 246     | 2/6/11 | 3         |                          | 21.46              | 0.47 | 2.24              | 0.37 | 23.70              | 0.40 | 10.57  | 1.75 | 0.91    | 0.02 |
| ATP 2011 | 246     | 2/6/11 | 7         |                          | 24.04              | 0.91 | 2.46              | 0.89 | 26.51              | 0.24 | 10.76  | 3.90 | 0.91    | 0.04 |
| ATP 2011 | 246     | 2/6/11 | 13        |                          | 51.12              | 0.58 | 5.94              | 0.44 | 57.06              | 0.62 | 9.61   | 0.72 | 0.90    | 0.01 |
| ATP 2011 | 249     | 3/6/11 | 3         |                          | 2.02               | 0.25 | 4.64              | 0.67 | 6.67               | 0.63 | 1.44   | 0.25 | 0.30    | 0.05 |
| ATP 2011 | 249     | 3/6/11 | 10        |                          | 4.60               | 0.57 | 2.80              | 0.78 | 7.40               | 0.83 | 2.64   | 0.79 | 0.62    | 0.10 |
| ATP 2011 | 249     | 3/6/11 | 17        |                          | 8.42               | 0.56 | 10.60             | 0.47 | 19.02              | 0.37 | 1.79   | 0.09 | 0.44    | 0.03 |



Table S2. Planktonic integrated metabolic rates down to 30m ( $\text{mmol O}_2 \text{ m}^{-2} \text{ d}^{-1}$ ) for stations and cruises where available data allowed this calculation. Rates are given as gross primary production (GPP), net community production (NCP) and community respiration (CR) and their associated standard error (SE).

| Cruise                 | Station | date       | NCP                            |       | CR                             |       | GPP                            |       |
|------------------------|---------|------------|--------------------------------|-------|--------------------------------|-------|--------------------------------|-------|
|                        |         |            | ( $\text{mmol/m}^2/\text{d}$ ) | SE    | ( $\text{mmol/m}^2/\text{d}$ ) | SE    | ( $\text{mmol/m}^2/\text{d}$ ) | SE    |
| ATOS                   | 1b      | 01/07/07   | -16.70                         | 25.10 | 38.96                          | 17.64 | 22.26                          | 20.73 |
| ATOS                   | 2b      | 02/07/07   | -67.48                         | 17.42 | 73.50                          | 14.14 | 24.07                          | 20.88 |
| ATOS                   | 3b      | 03/07/07   | -7.12                          | 13.22 | 63.10                          | 16.54 | 55.99                          | 17.84 |
| ATOS                   | 4b      | 04/07/07   | 10.83                          | 13.19 | 54.33                          | 13.33 | 65.16                          | 18.35 |
| ATOS                   | 6a      | 06/07/07   | -13.51                         | 13.89 | 205.94                         | 10.51 | 192.43                         | 14.55 |
| ATOS                   | 18a     | 10/07/07   | 63.23                          | 10.76 | 63.07                          | 21.12 | 126.30                         | 19.58 |
| ATOS                   | 20a     | 12/07/07   | -42.64                         | 17.86 | 338.54                         | 29.24 | 295.90                         | 31.75 |
| ATOS                   | 26a     | 14/07/07   | -158.74                        | 73.49 | 309.61                         | 64.17 | 150.88                         | 22.37 |
| ATOS                   | 27a     | 15/07/07   | -302.95                        | 88.96 | 578.34                         | 39.09 | 275.40                         | 68.79 |
| ATOS                   | 36b     | 18/07/07   | 388.98                         | 13.03 |                                | 12.40 | 0.00                           | 12.05 |
| ATOS                   | 39a     | 19/07/07   | 25.36                          | 15.79 | 54.62                          | 37.75 | 79.98                          | 38.15 |
| ATOS                   | 46a     | 23/07/07   | -176.57                        | 13.43 | 284.54                         | 11.81 | 107.96                         | 9.56  |
| ATOS                   | 49a     | 24/07/07   | -164.27                        | 16.41 | 220.45                         | 23.78 | 56.17                          | 25.80 |
| JM-July-august<br>2008 | 321     | 31/07/2008 | 8.99                           | 13.41 | 52.14                          | 13.51 | 61.14                          | 8.29  |
| JM-July-august<br>2008 | 326     | 02/08/2008 | 8.14                           | 12.01 | 60.54                          | 12.71 | 68.68                          | 8.49  |
| JM-July-august<br>2008 | 329     | 04/08/2008 | 15.81                          | 11.73 | 55.92                          | 12.47 | 86.99                          | 12.57 |
| ARCTOS                 | 419     | 29/11/2006 | -0.54                          | 36.22 | 0.54                           | 25.61 | 0.00                           | 25.61 |
| ARCTOS                 | 426     | 30/11/2006 | -10.66                         | 29.75 | 10.66                          | 21.03 | 0.00                           | 21.03 |
| ARCTOS                 | P1      | 01/12/2006 | -5.54                          | 33.75 | 5.54                           | 23.86 | 0.00                           | 23.86 |
| ARCTOS                 | Kb3     | 02/12/2006 | -20.04                         | 51.62 | 20.04                          | 36.50 | 0.00                           | 36.50 |
| ARCTOS                 | Kb5     | 02/12/2006 | -43.27                         | 23.78 | 43.27                          | 16.82 | 0.00                           | 16.82 |
| ARCTOS                 | Kb1     | 02/12/2006 | -74.37                         | 20.35 | 74.37                          | 14.39 | 0.00                           | 14.39 |

| Cruise   | Station | date       | NCP<br>(mmol/m2/d) | SE    | CR<br>(mmol/m2/d) | SE    | GPP<br>(mmol/m2/d) | SE    |
|----------|---------|------------|--------------------|-------|-------------------|-------|--------------------|-------|
| ATP 09   | 1       | 17/6/2009  | 243.13             | 49.90 | 115.30            | 30.45 | 358.43             | 29.97 |
| ATP 09   | 2       | 18/6/2009  | 395.10             | 48.57 | 133.01            | 26.74 | 488.49             | 31.01 |
| ATP 09   | 3       | 19/6/2009  | 407.67             | 25.20 | 133.01            | 26.74 | 459.53             | 29.82 |
| ATP 09   | 4       | 20/6/2009  | -12.50             | 20.23 | 133.01            | 26.74 | 69.64              | 25.47 |
| ATP 09   | 5       | 22/6/2009  | 317.98             | 21.78 | 133.01            | 26.74 | 423.61             | 29.35 |
| ATP 09   | 6       | 23/6/2009  | 304.58             | 24.92 | 133.01            | 26.74 | 374.60             | 24.18 |
| ATP 09   | K4      | 24/6/2009  | 25.36              | 20.75 | 80.14             | 40.35 | 105.51             | 37.41 |
| ATP 09   | T16     | 25/06/2009 | 284.20             | 25.25 | 133.01            | 26.74 | 412.50             | 23.51 |
| ATP 2011 | 240     | 31/05/2011 | 196.32             | 16.08 | 57.54             | 14.66 | 253.86             | 12.05 |
| ATP 2011 | 243     | 01/06/2011 | 208.86             | 10.23 | 134.47            | 9.15  | 343.33             | 10.78 |

Table S3. Parameters and their standard errors and statistics for the fitted quantile regression equations between volumetric ( $\text{mmol O}_2 \text{ m}^{-3} \text{ d}^{-1}$ ) and integrated ( $\text{mmol O}_2 \text{ m}^{-3} \text{ d}^{-1}$ ) metabolic rates and water temperature ( $^{\circ}\text{C}$ ) represented in figure 5.

| Volumetric        | Quartile    | Intercept $\pm$ SE  | Slope $\pm$ SE     | p          | N   |
|-------------------|-------------|---------------------|--------------------|------------|-----|
| NCP               | 50 (Median) | $2.28 \pm 1.04$     | $-0.31 \pm 0.25$   | 0.21       | 201 |
| NCP               | 10          | $-2.27 \pm 1.07$    | $-0.72 \pm 0.54$   | 0.18       | 201 |
| NCP               | 90          | $30.98 \pm 4.99$    | $-4.63 \pm 1.23$   | $< 0.0005$ | 201 |
| GPP               | 50 (Median) | $6.57 \pm 1.43$     | $-0.22 \pm 0.26$   | 0.40       | 167 |
| GPP               | 10          | $0.66 \pm 0.28$     | $-0.03 \pm 0.09$   | 0.74       | 167 |
| GPP               | 90          | $35.41 \pm 5.66$    | $-4.06 \pm 1.50$   | $< 0.01$   | 167 |
| CR                | 50 (Median) | $2.10 \pm 0.24$     | $0.13 \pm 0.08$    | 0.07       | 167 |
| CR                | 10          | $0.56 \pm 0.13$     | $0.01 \pm 0.05$    | 0.84       | 167 |
| CR                | 90          | $9.18 \pm 1.16$     | $0.72 \pm 0.48$    | 0.14       | 167 |
| <b>Integrated</b> |             |                     |                    |            | 167 |
| NCP               | 50 (Median) | $63.75 \pm 40.75$   | $-13.87 \pm 8.69$  | 0.12       | 58  |
| NCP               | 10          | $-21.85 \pm 31.56$  | $-13.00 \pm 14.58$ | 0.38       | 58  |
| NCP               | 90          | $534.87 \pm 164.28$ | $-79.88 \pm 39.13$ | $< 0.05$   | 58  |
| GPP               | 50 (Median) | $228.23 \pm 45.54$  | $-33.76 \pm 9.46$  | $< 0.001$  | 48  |
| GPP               | 10          | $3.32 \pm 6.46$     | $-0.69 \pm 0.96$   | 0.48       | 48  |
| GPP               | 90          | $665.95 \pm 173.15$ | $-63.19 \pm 42.28$ | 0.14       | 48  |
| CR                | 50 (Median) | $36.68 \pm 11.34$   | $5.01 \pm 5.52$    | 0.37       | 47  |
| CR                | 10          | $14.02 \pm 4.17$    | $-1.70 \pm 0.92$   | 0.07       | 47  |
| CR                | 90          | $197.62 \pm 30.36$  | $4.85 \pm 14.91$   | 0.74       | 47  |
